# Supplementary material
Source: MDPI journal article supplement (https://www.mdpi.com/2073-4433/7/8/102)
Supplement: s1 [file s1]

# Supplementary Materials: Water-Soluble Ionic Composition of Aerosols at Urban Location in the Foothills of Himalaya, Pokhara Valley, Nepal.

*Atmosphere*, 2016, 7, doi:10.3390/atmos7080102

Lekhendra Tripathy, Shichang Kang, Dipesh Rupakheti, Qiangong Zhang, Jie Huang and Mika Sillanpää

Table S1. Seasonal concentrations contribution (%) of sea salt aerosols.

| Seasons      | ss-SO <sub>4</sub> <sup>2-</sup> (%) | ss-K <sup>+</sup> (%) | ss-Ca <sup>2+</sup> (%) | ss-Mg <sup>2+</sup> (%) |
|--------------|--------------------------------------|-----------------------|-------------------------|-------------------------|
| Winter       | 24.8 ± 12.1                          | 11.2 ± 2.4            | 0.6 ± 0.3               | 10.9 ± 3.4              |
| Pre-monsoon  | 16.0 ± 5.7                           | 7.3 ± 2.9             | 0.6 ± 0.4               | 7.6 ± 4.1               |
| Monsoon      | 32.2 ± 20.3                          | 19.9 ± 5.7            | 1.2 ± 0.9               | 12.4 ± 4.6              |
| Post-monsoon | 16.7 ± 8.2                           | 15.4 ± 7.1            | 1.3 ± 0.8               | 17.5 ± 10.1             |

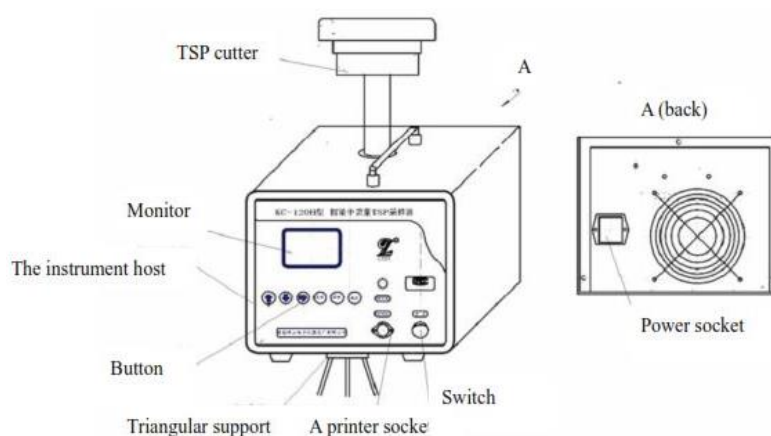

Figure S1. Overall structural diagram of the sampler.

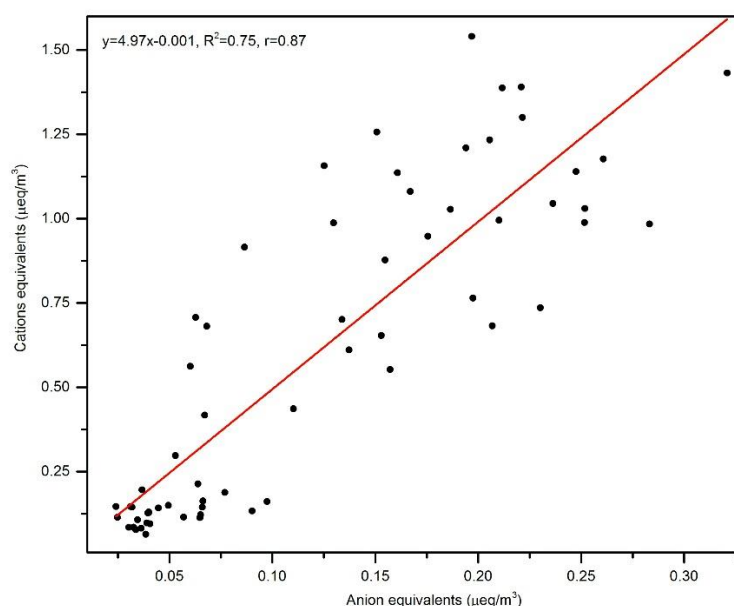

Figure S2. The  $\sum$ cations and  $\sum$ anions equivalents scatter plot.

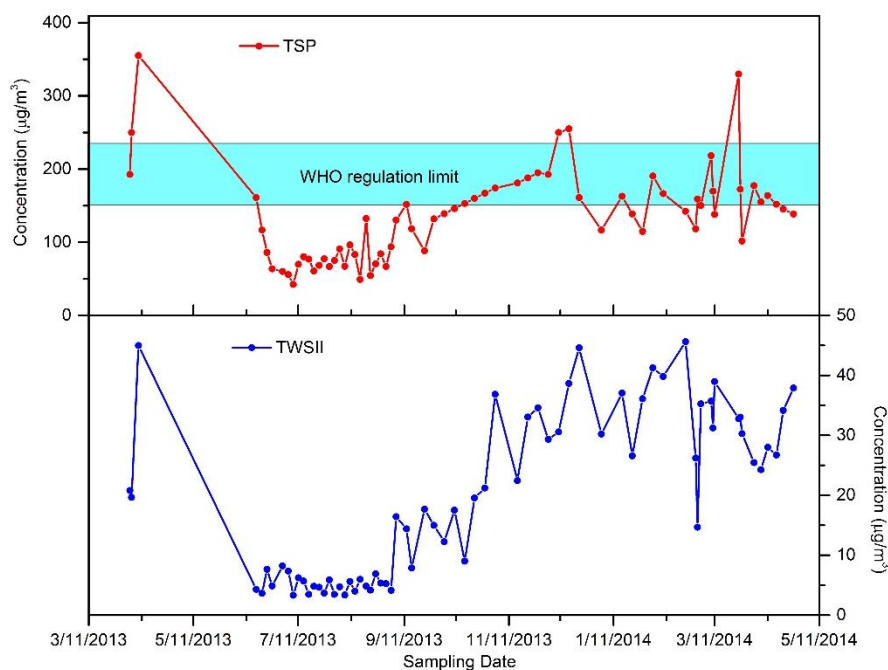

**Figure S3.** Daily TSP mass concentrations and TWSIIs variation over the sampling period (WHO regulation limit for TSP). Note: WHO regulation limit for TSP obtained from [1].

#### References

1. Xiao, H.-Y.; Liu, C.-Q. Chemical characteristics of water-soluble components in TSP over Guiyang, SW China, 2003. *Atmos. Environ.* **2004**, *38*, 6297–6306.

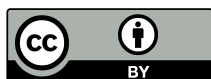

© 2016 by the authors; licensee MDPI, Basel, Switzerland. This article is an open access article distributed under the terms and conditions of the Creative Commons by Attribution (CC-BY) license (<http://creativecommons.org/licenses/by/4.0/>).
